# 1 Survey of intertidal ecosystem reveals a legacy of 2 potentially toxic elements from industrial activity 3 in the Skeena Estuary, British Columbia, Canada

4  
5 Tom Sizmur<sup>1\*</sup>, Lily Campbell<sup>2</sup>, Karina Dracott<sup>3</sup>, Megan Jones<sup>1</sup>, Nelson J.  
6 O'Driscoll<sup>4</sup> and Travis Gerwing<sup>2,5</sup>

7 <sup>1</sup> Department of Geography and Environmental Science, University of Reading, Reading, UK

8 <sup>2</sup> Department of Biology, University of Victoria, Victoria, British Columbia, Canada.

9 <sup>3</sup> North Coast Cetacean Research Initiative, Ocean Wise Conservation Association, Prince Rupert,  
10 British Columbia, Canada.

11 <sup>4</sup> Department of Earth & Environmental Sciences, Acadia University, Wolfville, Nova Scotia, Canada.

12 <sup>5</sup> Ecosystem Science and Management Program, University of Northern British Columbia, Prince  
13 George, British Columbia, Canada.

14 \*Corresponding author

15 Email: [t.sizmur@reading.ac.uk](mailto:t.sizmur@reading.ac.uk)

16

## 17 Abstract

18 Relationships between concentrations of Potentially Toxic Elements (PTEs) in estuarine sediments  
19 and their impact benthic invertebrate communities are poorly understood. We sampled and  
20 analysed PTEs in sediments and benthic invertebrates from five sites surrounding the Skeena  
21 Estuary, including sites adjacent to an abandoned cannery and a decommissioned papermill. There  
22 was no indication that sediments of the salmon cannery are polluted, but acidic sediments adjacent  
23 to the papermill contained elevated concentrations of Cd, Cr, Hg and Pb. Benthic invertebrate  
24 community assemblages confirm that sediments have recovered from prior disturbances associated  
25 with discharge of papermill sludge. Oregon pill bugs (*Gnorimosphaeroma oregonensis*), observed at  
26 all five sites, feed on the fibers associated with the papermill discharge. Thus, *G. oregonensis* are  
27 useful biomonitors for quantifying the impact of the decommissioned papermill, and similar  
28 industrial development projects, on intertidal ecosystems along the north coast of British Columbia,  
29 Canada.

30

## 31 Introduction

32 Conflict between the economic benefits of industrial development and the potential impact of such  
33 developments on the natural environment is most clearly expressed in remote communities, entirely  
34 dependent on natural capital for survival [1-3]. Anthropogenic activities have impacted the  
35 biogeochemical cycling of Potentially Toxic Elements (PTEs) in even the most remote ecosystems on  
36 our planet [4-6]. Quantifying the disruption of natural biogeochemical cycles of these elements by  
37 anthropogenic activities is difficult if the concentrations prior to industrial development are  
38 unknown and may be redundant if investigations are only conducted after environmental damage  
39 has occurred. Therefore, it is important to conduct baseline surveys to assess the bioavailability and  
40 bioaccumulation of PTEs by organisms in remote locations to predict the likely impact of further  
41 pollution on the ecosystem.

42

43 Intertidal estuarine sediments support ecologically and economically important ecosystems that  
44 provide nursery habitats to several species (some that support important commercial fisheries), and  
45 often host a diverse and abundant fauna [7-11]. Benthic invertebrates are often used as indicators of  
46 environmental pollution since they live in sediments and are prey for many commercially important  
47 fish species [12-14]. Benthic invertebrates inhabiting estuaries are inherently resistant to physical  
48 and chemical change as they have adapted to living in a dynamic environment with wide spatial and  
49 temporal ranges of chemical and physical properties, such as pH, redox potential, salinity, and  
50 particle size [15-17]. Because the chemical and physical properties of estuarine sediment are  
51 temporally and spatially dynamic, it is difficult to predict the impact of industrial development on  
52 the fate and impact of PTEs [18]. We do not currently understand the relationship between  
53 sediment properties, food web structure and PTE bioaccumulation by sediment-dwelling  
54 invertebrates well enough to predict the impact of future emissions to the estuarine environment.  
55 The objective of this study was to explore the relationship between sediment properties and the fate  
56 of PTEs from historic industrial development in the Skeena Estuary and quantify the impact of PTEs  
57 on the diversity of benthic invertebrates inhabiting intertidal sediments.

58

59 The Skeena is British Columbia's second largest river and provides important habitat for Pacific  
60 salmon populations, upon which Canadian First Nations communities rely [2, 8, 19]. The estuary and  
61 the intertidal areas towards the north of the Estuary along the coast of British Columbia are  
62 important nursery habitats for juvenile salmon [8, 19]. Coastal areas to the north of the estuary

63 surrounding the small port cities of Prince Rupert and Port Edward have been extensively developed  
64 [3-5, 20]. Industrial developments include an international port, a papermill, and several canneries.

65

66 Findings of previous surveys of the benthic invertebrates inhabiting the intertidal sediment in the  
67 Skeena estuary reveal an infaunal community that is relatively undisturbed at the estuary scale, but  
68 which still shows the scars of historic disturbance at finer-grained scales [10, 15, 21, 22]. Amphipods  
69 are powerful indicator species [23-27] whose high densities throughout the Skeena estuary [10, 15]  
70 suggests that current disturbances to intertidal areas are relatively limited. Similarly, we observe 40  
71 intertidal species in this area, including multiple species at all trophic levels within the foodweb [10,  
72 15], and such a complex community is often associated with non-disturbed habitats [4, 28-30].  
73 Conversely, disturbed sites are often more easily invaded by invasive species [31, 32], and  
74 Capitellidae (*Capitella capitata* species complex) polychaetas are often observed in disturbed  
75 habitats, particularly areas that have been organically enriched [4, 27, 28, 33]. Capitellidae  
76 polychaetas have a clumped distribution within the Skeena estuary and can be locally abundant at  
77 the scale of a 1m<sup>2</sup> plot [10, 15]. Similarly, abundant but localized populations of the invasive  
78 Cumacea *Nippoleucon hinumensis*, have been observed in the Skeena estuary [10, 15], and on other  
79 historically impacted mudflats along BC's north coast [27]. While the universal presence and high  
80 abundances of amphipods, coupled with the complexity of the intertidal community at the estuary  
81 scale strongly suggest that these intertidal communities are relatively undisturbed, the locally  
82 abundant populations of invasive species and Capitellidae polychaetas offer contradictory evidence.  
83 These indicators of disturbance suggest that either current small-scale disturbances are occurring, or  
84 this biological signal is a remnant of past disturbances.

85

86 Persistent localised biological signals of historic disturbances in mudflats that are currently relatively  
87 undisturbed have been observed before on the north coast of BC [27]. To the best of our knowledge,  
88 no current disturbances are occurring in the Skeena estuary that can explain the small-scale  
89 indicators of disturbance observed in the biological community [10, 15, 22, 27]. Therefore, we  
90 hypothesise that fine-grained biological indicators of disturbance in the Skeena estuary are a legacy  
91 of past disturbances [10, 15]. It is likely that these past disturbances are at least partially related to  
92 discharge from the papermill, which was released into the immediate near shore area (Porpoise  
93 Bay), strongly depressing the invertebrate communities in this area during the 1970s [20, 34, 35]. As

94 such, we postulate that these intertidal areas have been passively recovering from this disturbance  
95 for ~50 years.

96

97 Considerable developments have been proposed in the Skeena estuary, including oil and gas  
98 pipelines, super-tanker routes, potash loading facilities, and a liquid natural gas (LNG) terminal. The  
99 Skeena salmon run contributes an estimated \$110 million dollars annually to the local economy [36],  
100 so pollution of the intertidal nursery habitat of the Skeena Estuary could have devastating  
101 consequences on both the economy and ecosystem [37, 38]. It is therefore critical to predict the  
102 impact that future developments will have on the bioaccumulation of PTEs by benthic invertebrates  
103 inhabiting intertidal sediments of the Skeena Estuary. This work presents a survey of intertidal  
104 sediments and invertebrates at five locations north of the Skeena estuary to examine baseline levels  
105 of PTE concentrations at sites that may be recovering from previous disturbances and identify  
106 organisms that could be used to biomonitor the impact of future industrial developments.

107

## 108 **Methods**

### 109 **Field sampling**

110 Sediment cores and benthic invertebrates were collected from five locations north of the Skeena  
111 Estuary (Fig 1) during July 2017: Cassiar Cannery (CC), Inverness Passage (IP), Tye Banks (TB),  
112 Papermill Bay (PB), and Wolfe Cove (WC). Cassiar Cannery (N54° 10' 40.4, W130° 10' 40.4) is a  
113 former salmon cannery that closed in 1983 and is now an ecotourism lodge. Inverness passage (N54°  
114 10' 05.9, W130° 09' 40.4), a mudflat ~3 km closer to the Skeena mouth than Cassiar Cannery, has  
115 intertidal habitat similar to Cassiar Cannery, but was never directly impacted by a cannery or other  
116 anthropogenic development. Tye Banks (N54° 11' 59.1, W129° 57' 36.7) is located 20km upstream  
117 from the mouth of the Skeena River on a large intertidal mudflat. At some point in the past, this area  
118 had a small-scale sawmill operating and accumulations of sawdust and woodchips are still present in  
119 the upper intertidal sediment. Papermill Bay (N54° 13' 59.3, W130° 17' 07.5) is a small bay located  
120 directly adjacent to a large decommissioned papermill. Finally, Wolfe Cove (N54° 14' 33.0, W130° 17'  
121 34.5) is a mudflat located approximately 1 km from the papermill. The papermill was closed in 2001,  
122 ceasing all operations and discharge [39-41].

123

124 **Fig 1. Map showing sites adjacent to the Skeena Estuary, British Columbia, Canada where**  
125 **intertidal mudflats at Papermill Bay, Wolfe Cove, Cassiar Cannery, Inverness Passage, and Tye**  
126 **Banks were sampled during this project.**

127

128 Sediments were sampled by pushing polycarbonate cores (5 cm diameter, 20 cm length) into the  
129 mud with a rubber mallet, digging out with a spade, and wrapping with cling film, before extruding  
130 and dividing into strata; 0-5 cm, 5-10 cm, 10-15 cm and 15-20cm. Sediment samples from each strata  
131 were dried at 40 °C for 48 hours and shipped to the UK for analysis. A total of 15 cores were  
132 collected from each site along five transects comprising three samples taken from the upper, mid  
133 and lower shore in a random stratified sampling design [42]. Sediments from the upper, mid and  
134 lower shore (but the same strata) were pooled and homogenized prior to analysis. At each location  
135 that a sediment core was collected, two more cores (7 cm diameter) were taken to a depth of at  
136 least 5 cm (well into the anoxic layer), transferred to a plastic bag in the field and then passed  
137 through a 250µm stainless steel sieve to retain sediment-dwelling benthic infauna. This infauna  
138 sampling strategy was supplemented by opportunistic digging in areas of the site in which infauna  
139 were clearly present (e.g. burrow openings or surface casting) to collect macrofauna. All  
140 invertebrates found in sufficient quantities for chemical analysis were identified to the species level  
141 [10, 15], pooled into a single sample for each site, rinsed in deionised water, frozen, shipped to the  
142 UK, and freeze-dried prior to analysis.

143

## 144 **Laboratory analysis**

145 The particle size distribution of sediments was determined using laser granulometry (Malvern  
146 Mastersizer 3000). Sub-samples were then ground to a fine powder using an agate ball mill and  
147 analysed for total organic carbon and nitrogen content using a Thermo Scientific Flash 2000 Organic  
148 Elemental Analyser. Details of quality control can be found in the supporting information file.  
149 Sediment pH was determined in a soil-water suspension after shaking with water for 15 min at a  
150 1:10 w/v ratio based on BS7755-3.2 [43]. The total concentration of PTEs in sediments was  
151 determined by ICP-MS (Inductively Coupled Plasma Mass Spectrometry) analysis of 0.5 g sediment  
152 samples digested in reverse aqua regia (9 ml of nitric acid and 3 ml of hydrochloric acid) using a  
153 MARS 6 microwave digestion system, based on EPA [44]. After preliminary analysis of a large range  
154 of PTE concentrations, the elements selected for further investigation were Cadmium (Cd), Cobalt  
155 (Co), Chromium (Cr), Nickel (Ni), Lead (Pb) and Zinc (Zn). Details of quality control can be found in

156 the supporting information file. The total concentration of mercury in sediments was determined  
157 using thermal degradation – gold amalgamation atomic absorbance spectroscopy as outlined in EPA  
158 [45] using a Nippon MA-3000 analyser. Details of quality control can be found in the supporting  
159 information file. The bioavailability of PTEs to biota was estimated by extracting 2.5 g of sediments  
160 with 25 ml of 0.05M EDTA (Ethylenediaminetetraacetic acid) at 20°C for one hour, centrifuging,  
161 filtering and analysing PTEs (As, Cd, Co, Cr, Cu, Ni, Pb and Zn) in the extract using ICP-OES  
162 (Inductively Coupled Plasma Optical Emission Spectrometry). The total concentrations of PTEs in  
163 invertebrates were determined by ICP-MS analysis of 0.5 g of sample digested in slightly diluted  
164 nitric acid (2 ml of ultra-pure water and 8 ml of nitric acid) using a MARS 6 microwave digestion  
165 system.

166

## 167 **Statistical analysis**

168 The influence of site and sediment depth on sediment PTE concentrations and properties was  
169 quantified using analysis of variance (ANOVA) and permutational multivariate analysis of covariance  
170 (PERMANCOVA) [46, 47]. The relationship between PTE concentrations and sediment properties was  
171 first tested using PRIMER's RELATE function [48]. This function compares two resemblance matrices  
172 looking for any relationships. Relationships were further explored using principal component  
173 analyses (PCA) on the variance-covariance matrix of all sediment PTE and sediment property data.  
174 Relationships between the PTE concentrations observed in the sediments and in the collected  
175 invertebrates were examined in several configurations using RELATE and plotted using non-metric  
176 multidimensional (nMDS) scaling plots. A full description of the statistical analysis undertaken is  
177 provided in the supporting information file and outputs provided in S1, S2 and S3 Tables.

178

## 179 **Results and Discussion**

### 180 **Inverness Passage, Wolfe Cove and Tye Banks are suitable**

#### 181 **reference sites**

182 The PERMANCOVA analysis indicates that properties of sediments (pH, median particle diameter, C  
183 and N) are significantly influenced by both site and sediment depth, with site explaining more than  
184 50% of the observed variance in the data (S1 Table). There is no significant ( $p > 0.05$ ) difference in

185 the median sediment particle diameter between Inverness Passage and Cassiar Cannery, or between  
186 Wolfe Cove and Papermill Bay (Fig 2 and S3 Table). This observation supports our assumption that  
187 the sediment deposited in the sites potentially contaminated by industrial emissions (Cassiar  
188 Cannery and Papermill Bay) and their respective proximal reference sites (Inverness Passage and  
189 Wolfe Cove) have the same geogenic origin and are subject to a similar depositional environment.  
190 Thus, any differences in sediment chemical properties between potentially contaminated sites and  
191 their proximal reference sites we infer is due to anthropogenic influences.

192

193 **Fig 2. Sediment properties; Sediment pH (A); Median sediment particle diameter (B); Percentage**  
194 **Organic Carbon content (C); and Percentage Total Nitrogen content (D) presented at four depths in**  
195 **sediments sampled from Cassiar Cannery, Inverness Passage, Papermill Bay, Wolfe Cove and Tye**  
196 **Banks intertidal mudflats.**

197

198 Tye Banks has a significantly ( $p < 0.05$ ) larger median particle size than Inverness Passage and  
199 Cassiar Cannery and a significantly ( $p < 0.05$ ) smaller median particle size than Wolfe Cove and  
200 Papermill Bay (Fig 2 and S3 Table). The location of Tye Banks is closer to the mouth of the Skeena  
201 River and, therefore, only receives sediment from the Skeena, whereas the other four sites may also  
202 receive sediment from the Nass River, to the north of the Skeena Estuary [49]. However, because  
203 Tye Banks is much further from potential emission sources, the site can be used to determine  
204 whether proximal reference (Inverness Passage and Wolfe Cove) sites are contaminated with PTEs  
205 from the adjacent industrial activity.

206

## 207 **Papermill Bay sediments are contaminated with Cd, Cr, Hg and Pb**

208 The PERMANCOVA analysis (S2 Table) indicates significant differences in sediment total and EDTA  
209 extractable PTE concentrations between different sites, but not between different depths. We  
210 observed significantly ( $p < 0.05$ ) greater concentrations of As, Cr, Hg and Pb in the Papermill Bay  
211 sediments than the proximal reference sediments at Wolfe Cove (Fig 3 and S3 Table). However, Co,  
212 Cu and Ni concentrations were significantly ( $p < 0.05$ ) lower in the Papermill Bay sediments (Fig 3  
213 and S3 Table). A Geoaccumulation index, calculated following [50], using Wolfe Cove as an  
214 uncontaminated reference site, indicates that Papermill Bay is 'unpolluted' with As, Cd, Co, Cr, Cu, Ni  
215 and Zn, but 'unpolluted to moderately polluted' with Pb and 'moderately polluted' with Hg (Table 1).  
216 When Tye Banks is used as the reference site, Papermill Bay is classified as 'unpolluted to

217 moderately polluted' with Cd, Cr and Hg. Thus, there is evidence to suggest that the sediments in  
 218 Papermill Bay are contaminated with Cd, Cr, Hg and Pb, most likely emanating from the sludge [51]  
 219 discharged by the decommissioned papermill on Watson Island (Fig 1).

220

221 **Fig 3. Total concentrations of Potentially Toxic Elements (As, Cd, Co, Cr, Cu, Hg, Ni, Pb and Zn) with**  
 222 **depth in sediments sampled from Cassiar Cannery, Inverness Passage, Papermill Bay, Wolfe Cove**  
 223 **and Tye Banks intertidal mudflats**

224

225 **Table 1. Geoaccumulation index ( $I_{geo}$ )<sup>a</sup> for potentially toxic elements in sediments from Cassiar**  
 226 **Cannery (CC) and Papermill Bay (PB) using reference sites Tye Banks (TB), Wolfe Cove (WC) and**  
 227 **Inverness Passage (IP).**

| Site | Reference site | As    | Cd    | Co    | Cr    | Cu    | Hg    | Ni    | Pb    | Zn    |
|------|----------------|-------|-------|-------|-------|-------|-------|-------|-------|-------|
| CC   | IP             | -0.99 | -0.71 | -0.78 | -0.57 | -0.69 | -0.69 | -0.67 | -0.58 | -0.63 |
|      | TB             | -0.48 | -0.33 | -0.44 | -0.27 | -0.01 | -0.13 | -0.26 | 0.08  | -0.24 |
| PB   | WC             | -0.10 | -0.25 | -1.08 | -0.32 | -1.14 | 1.61  | -0.82 | 0.74  | -0.60 |
|      | TB             | -1.51 | 0.39  | -0.90 | 0.35  | -0.19 | 0.20  | -1.01 | -0.02 | -0.45 |

228 <sup>a</sup> Geoaccumulation index is calculated as  $I_{geo} = \text{Log}_2 \frac{C_n}{1.5 \times B_n}$

229 when  $C_n$  = Concentration measured in sediment at site and  $B_n$  = Concentration measured in sediment at  
 230 reference (background) site.

231 Sites are classified as unpolluted if  $I_{geo} \leq 0$ , unpolluted to moderately polluted if  $0 < I_{geo} \leq 1$ , moderately  
 232 polluted if  $1 < I_{geo} \leq 2$ , moderate to strongly polluted if  $2 < I_{geo} \leq 3$ , strongly polluted if  $3 < I_{geo} \leq 4$ ,  
 233 strongly to extremely polluted if  $4 < I_{geo} \leq 5$ , and extremely polluted if  $I_{geo} > 5$ .

234

235 Discharges by papermills have previously been associated with pollution of the environment with  
 236 PTEs, including Cr, Cd, Cu, Pb and Zn [52, 53]. This pollution associated with papermill operations can  
 237 originate from a number of sources, such as metals in the wood entering the papermill, or  
 238 atmospheric deposition of metals from the smoke stacks [52]. PTE-containing materials may also be  
 239 used during the pulp making processes. For example, chromate bricks are used in the recovery  
 240 furnace of kraft paper mills to reduce chemical attack by the spent liquors [54]. However, Cr  
 241 concentrations observed in the sediments of Papermill Bay (Fig 3) are considerably lower than the  
 242 52.4 mg kg<sup>-1</sup> observed in a deposit of pulp covering the sediments of a Swiss lake [55], or



243 concentrations of up to 197 mg kg<sup>-1</sup> observed in a fibrous deposit in the Ångermanälven river  
244 estuary, on the east coast of Sweden (Apler et al 2019).

245

246 The carbon and nitrogen content of the sediments at Papermill Bay were significantly ( $p < 0.05$ ) and  
247 considerably greater than all of the other sites (Fig 2 and S3 Table). It was evident from visual  
248 inspection of the sediments themselves that they contained a high proportion of organic fibers,  
249 presumably discharged into the bay from the papermill during the operational phase. The PTEs  
250 observed to be elevated in the Papermill Bay sediments (Cd, Cr, Hg and Pb) all bind strongly to  
251 organic matter in sediments [56-58] and so their presence could be due to (i) the discharge and  
252 deposition of PTE contaminated organic material, (ii) the discharge of organic material alongside the  
253 discharge of PTEs in contaminated effluent that later bind with the organic material, or (iii) the  
254 discharge of organic material which binds to naturally present PTEs in the sediment and prevents  
255 their export to the overlying water.

256

257 In contrast to the observations made in the Papermill Bay sediments, none of the PTEs analysed in  
258 the Cassiar Cannery sediments were found to be present in significantly ( $p > 0.05$ ) greater  
259 concentrations than the Inverness Passage sediments (Fig 3 and S3 Table). In fact, Co and Ni  
260 concentrations were significantly lower in Cassiar Cannery sediments than at Inverness Passage.  
261 When Inverness Passage is used as a reference site, all the PTEs analysed can be classified by the  
262 Geoaccumulation index as 'unpolluted' (Table 1). This observation is a clear indicator that any impact  
263 resulting from either the former use of the Cassiar Cannery site (up until 1983) as a salmon cannery,  
264 or its current use as an ecotourism lodge, can no longer be observed in the concentrations of PTEs in  
265 the top 20 cm of sediment at this site. Any sediment contaminated by cannery waste at this site may  
266 have been buried by fresh sediment, rendering the PTEs inaccessible to benthic invertebrates.

267

## 268 **Relationship between sediment properties and total and labile PTE** 269 **concentrations**

270 Alongside greater total concentrations of Cd, Cr, Hg and Pb in the Papermill Bay sediments,  
271 compared to Wolfe Cove, we observed significantly ( $p < 0.05$ ) greater EDTA extractable  
272 concentrations of Cd, Co, Cr, Ni, Pb and Zn (Fig 4 and S3 Table), indicating a greater availability of

273 these elements to benthic invertebrates [59]. The significantly ( $p < 0.05$ ) greater carbon content and  
274 the slightly finer texture of the Papermill Bay sediments, compared to Wolfe Cove (Fig 2 and S3  
275 Table) should provide more sites for PTEs to bind to [58, 60, 61]. Thus, the greater concentrations of  
276 EDTA extractable PTEs is largely due to the Papermill Bay sediments being significantly ( $p < 0.05$ )  
277 more acidic than the Wolfe Cove sediments. Lower pH results in greater competition between PTEs  
278 and hydrogen ions for the binding sites on the sediment surface and leads to greater PTE lability [62,  
279 63].

280

281 **Fig 4. EDTA extractable (potentially bioavailable) Potentially Toxic Elements (Cd, Co, Cr, Cu, Ni, Pb**  
282 **and Zn) with depth in sediments sampled from Cassiar Cannery, Inverness Passage, Papermill Bay,**  
283 **Wolf Cove, and Tye Banks intertidal mudflats**

284

285 The RELATE revealed a statistically significant correlation between the concentration of potentially  
286 toxic elements and the sediment physicochemical properties resemblance matrices ( $Rho: 0.46$ ;  $p =$   
287  $0.001$ , Permutations = 9999). The relationship between total and labile PTE concentrations and  
288 sediment properties was further explored using PCA (Fig 5). The principal component scores plot (Fig  
289 5B) reveals a clear separation between the Papermill Bay sediments and the proximal and remote  
290 references sites of Wolfe Cove and Tye Banks, but no separation between Cassiar Cannery and  
291 Inverness Passage, re-enforcing the conclusion that the sediments of Cassiar Cannery show little  
292 evidence of anthropogenic contamination. Principal component 2 (Fig 5), separates the Inverness  
293 Passage and Cassiar Cannery sediments from the other three sites (Papermill Bay, Wolfe Cove, and  
294 Tye Banks), which is attributed to a different geochemical matrix composition at Cassiar Cannery  
295 and Inverness Passage, as also observed by DelValls et al. [64]. Principal component 1 (Fig 5) reveals  
296 a separation with depth in the Papermill Bay sediments. Papermill Bay sediments have greater total  
297 and EDTA extractable concentrations of several PTEs, higher C and N, and lower pH, all of which also  
298 increase with depth in the Papermill Bay sediments. This observation of deeper layers of sediment  
299 with a lower pH and higher availability of PTEs indicates that contaminated sediment is overlain by  
300 less contaminated sediment, deposited since discharge of sludge ceased. Although most benthic  
301 invertebrates live in surficial sediments, it is important to consider the likelihood that deeper  
302 sediment will be exposed and mobilized either by development projects [65], or by bioturbation  
303 from deep burrowing invertebrates [66, 67].

304

305 Fig 5. Principal Components Analysis of sediment properties (pH median sediment particle  
306 diameter, Percentage Organic Carbon content and Percentage Total Nitrogen content) and total  
307 and EDTA extractable Potentially Toxic Elements (As, Cd, Co, Cr, Cu, Hg, Ni, Pb and Zn) in  
308 sediments sampled 0-5 cm, 5-10 cm, 10-15 cm and 15-20cm from Cassiar Cannery, Inverness  
309 Passage, Papermill Bay, Wolf Cove and Tye Banks intertidal mudflats. (A) is the latent vectors for  
310 each variable plotted in the plane of principal component one and principal component two, (B) is  
311 the principal component scores of all the samples plotted in the plane of principal component one  
312 and principal component two. Error bars represent the standard deviations of 5 replicate samples  
313 taken from 5 different transects.

314

## 315 Sediments host a healthy invertebrate population with no 316 relationship between PTE concentrations in sediments and 317 invertebrates

318 Overall, 22 different taxa (listed in S4 Table, along with PTE concentrations) were observed in this  
319 study, with Wolf Cove and Cassiar Cannery the most biodiverse sites, with 16 and 14 species  
320 collected, respectively. These taxa represent a subset of the 40 intertidal species that are commonly  
321 observed in the Skeena Estuary [10, 15]. Findings of previous studies in the Skeena Estuary reveal an  
322 infaunal community predominantly dominated by cumaceans, polychaetes, oligochaetes,  
323 nematodes, copepods, amphipods, and bivalves [15, 68]. The 40 intertidal species observed in this  
324 area include multiple species at all trophic levels within the food web [10, 15], and such a complex  
325 community is often associated with non-disturbed habitats [4, 28]. This complexity was also  
326 observed in our study, as *Alitta brandti*, *Neries vexillosa*, *Glycinde picta*, ribbon worms and crabs can  
327 act as predators, while *Macoma balthica*, isopods, amphipods, and sessile polychaete worms are  
328 primary consumers [47, 69, 70]. We therefore provide evidence to support our previous research  
329 that indicates that the intertidal ecosystem has been passively recovering for ~50 years from past  
330 disturbances related to discharge from the papermill, which was released into the immediate near  
331 shore area (Porpoise Bay), strongly depressing the invertebrate communities in this area during the  
332 1970s [20, 34, 35] and currently exhibit a community that is relatively healthy.

333

334 When all invertebrates collected at all five sites are considered, we found no relationship between  
335 PTE concentrations in invertebrates and either total (Rho: 0.27;  $p = 0.32$ , Permutations = 9999),  
336 EDTA extractable (Rho: 0.24;  $p = 0.79$ , Permutations = 9999), or both total and EDTA extractable  
337 (Rho: 0.78;  $p = 0.08$ , Permutations = 9999) PTEs in the sediment. This finding is confirmed by

338 inspecting a nMDS plot of invertebrate PTE loadings, which includes all organisms collected at all five  
339 sites (Fig 6A). Bivalves of the same species (e.g. *M. balthica*, *Mytilus edulis*, and *Mya arenaria*),  
340 collected at different sites, seem to cluster in multidimensional space. There is slightly more  
341 separation in the PTE concentrations measured in polychaete worms (e.g. *Abarenicola pacifica*, *N.*  
342 *vexillosa*, *Paranemertes peregrina*, *G. picta*, *A. brandti*, *Nephtys caeca*, *Neotrypaea californiensis*, and  
343 *Streblospio benedicti*) which are the cause of much of the dissimilarity in the dataset.

344

345 **Fig 6. Non-metric multidimensional scaling plots (nMDS) of invertebrate PTE concentrations and**  
346 **the vector overlay (left hand side) of five intertidal mudflats along the north coast of British**  
347 **Columbia, Canada. CC: Cassiar Cannery. WC: Wolfe Cove. IP: Inverness Passage. PB: Papermill Bay.**  
348 **TB: Tye Banks with (A) the entire dataset considered or (B) only including the two benthic**  
349 **invertebrates found at all five sites; Baltic clams (*Macoma balthica*) and Oregon pill bugs**  
350 **(*Gnorimosphaeroma oregonensis*).**

351

## 352 **The suitability of *G. oregonensis* as biomonitors of sediment PTE** 353 **bioavailability**

354 The selection of one or more of benthic invertebrate as a biomonitor of PTE pollution needs to  
355 consider how cosmopolitan their distribution is and the pathway by which they are exposed to the  
356 PTE [71]. Mussels and clams acquire food from the water column by suspension feeding, and clams  
357 are also able to acquire food from surface sediments by way of their siphon. Isopods are more  
358 motile and acquire food by ingesting organic debris, usually on the surface of the sediment.  
359 Polychaete worms, as a class, have a more diverse range of feeding strategies, including suspension  
360 feeding with tentacles or a mucus net, deposit feeding selectively at the surface or at depth, and  
361 predation of other infauna [72, 73]. This large diversity of feeding strategies may have led to the  
362 greater range of PTE concentrations observed in Fig 6A, compared to the bivalves and crustacea.  
363 Furthermore, the soft tissues of polychaete worms may only represent exposure to PTEs in the  
364 recent past due to large temporal fluctuations [74-76]. The whole body (including soft tissues and  
365 shells) of bivalves may better represent a record of time-averaged bioavailability of PTEs in the water  
366 column over the lifetime of the organism, albeit not without difficulties in interpretation [77, 78].

367

368 There were only two benthic invertebrate species observed at all five sites; Baltic clams (*M. balthica*)  
369 and Oregon pill bugs (*G. oregonensis*). When PTE concentrations in *M. balthica*, and *G. oregonensis*

370 was compared to sediment concentrations, no relationship was observed with either total (Rho:  
371 0.31;  $p = 0.19$ , Permutations = 9999), EDTA extractable (Rho: -0.0.;  $p = 0.48$ , Permutations = 9999),  
372 or both total and EDTA extractable (Rho: 0.21;  $p = 0.28$ , Permutations = 9999) sediment PTE  
373 concentrations. These findings contrast to numerous articles in the literature quantifying  
374 relationships between sediment and benthic invertebrate PTE concentrations [58, 71, 79, 80]. When  
375 we plot the PTE concentrations in *M. balthica*, and *G. oregonensis* in multidimensional space (Fig  
376 6B), we reveal that the elemental profiles of *M. balthica*, and *G. oregonensis* contrast greatly. *M.*  
377 *Balthica* collected at Papermill Bay contained lower concentrations of Cr, Co, Ni, Zn, Cd, As and Pb  
378 than those collected at the other four sites, but higher concentrations of Cu. In contrast, *G.*  
379 *oregonensis* collected at Papermill Bay have higher concentrations of Cr, Ni, Zn, and Pb than those  
380 collected at the other four sites.

381

382 Biota-Sediment Accumulation Factors (BSAFs) were calculated by dividing the concentrations of PTEs  
383 in the invertebrate tissues by the average concentration in the sediments from the site from which  
384 the invertebrates were collected (average across all transects and depths). Relationships between  
385 sediment properties and BSAFs reveal the importance of pH in explaining the difference in the  
386 bioaccumulation of PTEs by *M. balthica*, and *G. oregonensis*. For most PTEs there is a positive  
387 relationship between pH and the BSAF for *M. Balthica* (Table 2), including a significant relationship  
388 with the Cr BSAF (Fig 7A). This is an unexpected finding that does not have an immediately obvious  
389 explanation. However, we observe a negative relationship between sediment pH and the BAF of  
390 most PTEs for *G. oregonensis* (Table 2), including Cr (Fig 7B). This relationship is intuitive since metal  
391 cations dissociate from mineral surfaces at lower pH levels [62, 63]. Because *G. oregonensis* feed on  
392 organic material on the surface of the sediments, the concentrations of PTEs associated with acidic  
393 sediments contaminated by papermill sludge at Papermill Bay, are more likely to be assimilated by  
394 *G. oregonensis* and become bioaccumulated in their tissues. A survey of intertidal areas adjacent to  
395 papermills on the British Columbia coastline (including the papermill on Watson island) identified *G.*  
396 *oregonensis* as tolerant of papermill impacted shorelines [81]. The greater abundance of isopods  
397 (including *G. oregonensis*) in close proximity to British Columbian papermills, also observed by Robin  
398 et al. [82], is attributed to the provision of pulp fibers from the mill as a food source creating a  
399 stressed environment which enables these isopods to thrive.

400 **Fig 7. The relationship between Chromium (Cr) Biota-Sediment Accumulation Factor (BSAF) and**  
401 **sediment pH for (A) Baltic clams (*Macoma balthica*) and (B) Oregon pill bugs (*Gnorimosphaeroma***  
402 ***oregonensis*) sampled at five intertidal mudflats along the north coast of British Columbia, Canada.**

403

404 **Table 2. Correlation coefficients for the relationship between sediment pH and Biota-Sediment**  
405 **Accumulation Factors of 8 potentially toxic elements in Baltic clams (*Macoma balthica*) and**  
406 **Oregon pill bugs (*Gnorimosphaeroma oregonensis*) at all five sampling locations in the Skeena**  
407 **Estuary.**

| Species               | As      | Cd     | Co       | Cr       | Cu      | Ni      | Pb      | Zn       |
|-----------------------|---------|--------|----------|----------|---------|---------|---------|----------|
| <i>M Balthica</i>     | 0.4397  | 0.2564 | 0.9162   | 0.8255*  | -0.8177 | 0.9461  | 0.5788  | 0.896    |
| <i>G. oregonensis</i> | -0.1744 | 0.3758 | -0.7362* | -0.8688* | -0.1895 | -0.8117 | -0.2083 | -0.7732* |

408 \* =  $p < 0.05$

409

## 410 Conclusions

411 We found evidence to indicate that the discharge of papermill sludge from the decommissioned  
412 papermill on Watson Island has changed the sediment geochemistry at Papermill Bay by reducing  
413 the pH, and increasing the total and EDTA extractable concentrations of Cd, Cr, and Pb. However, the  
414 benthic invertebrate community composition confirms that the population has recovered from  
415 previous disturbance. Oregon pill bugs (*G. oregonensis*) were one of only two benthic invertebrate  
416 species observed at all five sites we visited. *G. oregonensis* are a cosmopolitan species along the  
417 north coast of British Columbia and are tolerant of sites contaminated with papermill effluent  
418 because they use the fibers discharged as a food source. Thus, we conclude here that *G. oregonensis*  
419 make an excellent candidate biomonitor species to assess recovery from the environmental impact  
420 of the papermill on Watson Island and monitor the future impacts of similar industrial developments  
421 in the region.

422

## 423 Acknowledgements

424 Sean Allen is acknowledged for fieldwork assistance. Ilse Kamerling is acknowledged for assisting C  
425 and N analysis. Anne Dudley is acknowledged for assisting ICP-OES analysis. Andy Dodson is  
426 acknowledged for assisting ICP-MS analysis. Accommodation and access to the shoreline were  
427 graciously provided by Cassiar Cannery Ecotourism lodge.

428

## 429 References

- 430 1. Parlee BL. Avoiding the Resource Curse: Indigenous Communities and Canada's Oil  
431 Sands. *World Development*. 2015;74:425-36. doi:  
432 <http://dx.doi.org/10.1016/j.worlddev.2015.03.004>.
- 433 2. Gerwing TG, Cox K. Erosion of trust in government consultation will impede the creation  
434 of environmental policy. *Marine Policy*. 2017;83:126-7.
- 435 3. Waldichuk M, Bousfield EL. Amphipods in low-oxygen marine waters adjacent to a  
436 sulphite pulp mill. *Journal of the Fisheries Board of Canada*. 1962;19(6):1163-5.
- 437 4. Pearson TH, Rosenberg R. A comparative study of the effects on the marine environment  
438 of wastes from cellulose industries in Scotland and Sweden. *Ambio*. 1976:77-9.
- 439 5. Tuominen TM, Sekela MA. Dioxins and furans in sediment and fish from the vicinity of  
440 four inland pulp and/or paper mills and one petroleum refinery in British Columbia:  
441 Environment Canada. Conservation and Protection; 1992.
- 442 6. Yunker MB, Lachmuth CL, Cretney WJ, Fowler BR, Dangerfield N, White L, et al. Biota-  
443 sediment partitioning of aluminium smelter related PAHs and pulp mill related diterpenes by  
444 intertidal clams at Kitimat, British Columbia. *Marine Environmental Research*.  
445 2011;72(3):105-26.
- 446 7. Kritzer JP, DeLucia M-B, Greene E, Shumway C, Topolski MF, Thomas-Blate J, et al. The  
447 Importance of Benthic Habitats for Coastal Fisheries. *BioScience*. 2016;66(4):274-84. doi:  
448 10.1093/biosci/biw014.
- 449 8. Carr-Harris C, Gottesfeld AS, Moore JW. Juvenile Salmon usage of the Skeena River  
450 Estuary. *PloS One*. 2015;10(3):e0118988.
- 451 9. Schindler DE, Scheuerell MD, Moore JW, Gende SM, Francis TB, Palen WJ. Pacific  
452 salmon and the ecology of coastal ecosystems. *Frontiers in Ecology and the Environment*.  
453 2003;1(1):31-7.
- 454 10. Gerwing TG, Gerwing AMA, Macdonald T, Cox K, Juanes F, Dudas SE. Intertidal soft-  
455 sediment community does not respond to disturbance as postulated by the intermediate  
456 disturbance hypothesis. *Journal of Sea Research*. 2017;129:22-8.
- 457 11. Gerwing TG, Allen Gerwing AM, Drolet D, Barbeau MA, Hamilton DJ. Spatiotemporal  
458 variation in biotic and abiotic features of eight intertidal mudflats in the Upper Bay of Fundy,  
459 Canada. *Northeastern Naturalist*. 2015;22(12):1-44.
- 460 12. Amoozadeh E, Malek M, Rashidinejad R, Nabavi S, Karbassi M, Ghayoumi R, et al.  
461 Marine organisms as heavy metal bioindicators in the Persian Gulf and the Gulf of Oman.  
462 *Environmental Science and Pollution Research*. 2014;21(3):2386-95.
- 463 13. Gómez Gesteira JL, Dauvin J-C. Amphipods are good bioindicators of the impact of oil  
464 spills on soft-bottom macrobenthic communities. *Marine Pollution Bulletin*.  
465 2000;40(11):1017-27.

- 466 14. Gerwing TG, Hamilton DJ, Barbeau MA, Haralampides KA, Yamazaki G. Short-term  
467 response of a downstream marine system to the partial opening of a tidal-river causeway.  
468 *Estuaries and Coasts* 2017;40(3):717-25. doi: 10.1007/s12237-016-0173-2.
- 469 15. Gerwing TG, Allen Gerwing AM, Macdonald T, Cox K, Juanes F, Dudas SE. Assessing  
470 the relationship between community dispersion and disturbance in a soft-sediment ecosystem.  
471 *Marine Ecology*. 2018;39(4):e12505.
- 472 16. Scholz B, Liebezeit G. Microphytobenthic dynamics in a Wadden Sea intertidal flat—Part  
473 II: Seasonal and spatial variability of non-diatom community components in relation to  
474 abiotic parameters. *European Journal of Phycology*. 2012;47(2):120-37.
- 475 17. van Proosdij D, Milligan T, Bugden G, Butler K. A tale of two macro tidal estuaries:  
476 differential morphodynamic response of the intertidal zone to causeway construction. *Journal*  
477 *of Coastal Research*. 2009;56:772–6.
- 478 18. de Souza Machado AA, Spencer K, Kloas W, Toffolon M, Zarfl C. Metal fate and effects  
479 in estuaries: A review and conceptual model for better understanding of toxicity. *Science of*  
480 *The Total Environment*. 2016;541:268-81. doi:  
481 <http://dx.doi.org/10.1016/j.scitotenv.2015.09.045>.
- 482 19. Moore JW, Gordon J, Carr-Harris C, Gottesfeld AS, Wilson SM, Russell JH. Assessing  
483 estuaries as stopover habitats for juvenile Pacific salmon. *Marine Ecology Progress Series*.  
484 2016;559:201-15.
- 485 20. Wilkes B, Dwernychuk LW. Environment studies in the marine receiving environment at  
486 the Skeena Cellulose pulp mill, Watson Island, BC. *Pulp & Paper Canada*. 1991;92:10.
- 487 21. Gerwing TG. Preliminary report of intertidal research along the north coast of British  
488 Columbia: Summer 2016. Report to the Kitsumkalum First Nations. 34 p. 2016.
- 489 22. Gerwing TG, Cox K, Gerwing AMA, Carr-Harris CN, Dudas SE, Juanes F. Depth to the  
490 apparent redox potential discontinuity (aRPD) as a parameter of interest in marine benthic  
491 habitat quality models. *International Journal of Sediment Research*. 2018;33(2):149-56.
- 492 23. Sánchez-Moyano JE, García-Gómez JC. The arthropod community, especially Crustacea,  
493 as a bioindicator in Algeciras Bay (Southern Spain) based on a spatial distribution. *Journal of*  
494 *Coastal research*. 1998;14(3):1119-33.
- 495 24. Thomas JD. Biological monitoring and tropical biodiversity in marine environments: A  
496 critique with recommendations, and comments on the use of amphipods as bioindicators.  
497 *Journal of Natural History*. 1993;27(4):795-806.
- 498 25. Conlan K. Amphipod crustaceans and environmental disturbance: a review. *Journal of*  
499 *Natural History*. 1994;28(3):519-54.
- 500 26. Picone M, Bergamin M, Novelli Alessandra A, Noventa S, Delaney E, Barbanti A, et al.  
501 Evaluation of *Corophium orientale* as bioindicator for Venice Lagoon: Sensitivity assessment  
502 and toxicity-score proposal. *Ecotoxicology and Environmental Safety*. 2008;70(1):174-84.



- 503 27. Gerwing TG, Campbell L, Allen Gerwing AM, Allen S, Cox K, Rogers M, et al. Potential  
504 impacts of logging on intertidal infaunal communities within the Kitimat River estuary.  
505 *Journal of Natural History*. 2018;52(43-44):2833-55.
- 506 28. Pearson TH, Rosenberg R. Macrobenthic succession in relation to organic enrichment and  
507 pollution of the marine environment. *Oceanography and Marine Biology: An Annual*  
508 *Review*. 1978;16:229-331.
- 509 29. Allen L. The application of biodiversity indicators to infer ecosystem health in  
510 regenerating tropical forest: University of Glasgow; 2019.
- 511 30. Zhang W, Dulloo E, Kennedy G, Bailey A, Sandhu H, Nkonya E. Biodiversity and  
512 Ecosystem Services. *Sustainable Food and Agriculture*: Elsevier; 2019. p. 137-52.
- 513 31. Smith MD, Knapp AK. Exotic plant species in a C 4-dominated grassland: invasibility,  
514 disturbance, and community structure. *Oecologia*. 1999;120(4):605-12.
- 515 32. Burke MJW, Grime JP. An experimental study of plant community invasibility. *Ecology*.  
516 1996;77(3):776-90.
- 517 33. Guerra-García JM, García-Gómez JC. Polychaete assemblages and sediment pollution in  
518 a harbour with two opposing entrances. *Helgoland Marine Research*. 2004;58(3):183-91.
- 519 34. HC. Hatfield Consultants Ltd. Skeena environmental effects monitoring (EEM) pre-  
520 design reference document. Prepared for Skeena Cellulose Inc. 1994.
- 521 35. Hoos LM. The Skeena River Estuary: status of environmental knowledge to 1975: Report  
522 of the Estuary Working Group, Department of the Environment, Regional Board, Pacific  
523 Region. Environment Canada, 1975 Contract No.: 3.
- 524 36. NIBR. Northwest Institute for Bioregional Research: Valuation of the wild Salmon  
525 economy of the Skeena River watershed. 1-30 2006.
- 526 37. Hilborn R, Walters CJ. Differing goals of salmon management on the Skeena River.  
527 *Journal of the Fisheries Board of Canada*. 1977;34(1):64-72.
- 528 38. Higgins RJ, Schouwenburg WJ. A biological assessment of fish utilization of the Skeena  
529 River Estuary, with special reference to port development in Prince Rupert. Technical Report  
530 1973-1. Department of Environment, Fisheries and Marine Services. Vancouver, BC, 1973.
- 531 39. Faggetter BA. Review of the Environmental and Socioeconomic  
532 Impacts of Marine Pollution in the  
533 North and Central Coast Regions of British  
534 Columbia. 2008.
- 535 40. Yunker MB, Cretney WJ, Ikonomou MG. Assessment of chlorinated dibenzo-p-dioxin  
536 and dibenzofuran trends in sediment and crab hepatopancreas from pulp mill and harbor sites  
537 using multivariate- and index-based approaches. *Environmental Science & Technology*.  
538 2002;36(9):1869-78. doi: 10.1021/es0112893. PubMed PMID: WOS:000175311900006.

- 539 41. Akenhead S. A review of the oceanography and marine ecology of Prince Rupert  
540 Harbour a propos sewage outfalls. 1992.
- 541 42. Cox K, Black M, Filip N, Miller M, Mohns K, Mortimor J, et al. Comparison of  
542 community assessment techniques and implications for diversity indices and species  
543 accumulation curves. *Ecology and Evolution*. 2017;DOI: 10.1002/ece3.3580.
- 544 43. BS7755-3.2. Soil Quality. Part 3: Chemical Methods. Section 3.2: Determination of pH  
545 British Standards Institution, London, UK. 1995.
- 546 44. EPA US. Method 3051A (SW-846): Microwave Assisted Acid Digestion of Sediments,  
547 Sludges, and Oils, Revision 1. Washington, DC. 2007.
- 548 45. EPA US. Method 7473 (SW-846): Mercury in Solids and Solutions by Thermal  
549 Decomposition, Amalgamation, and Atomic Absorption Spectrophotometry, Revision 0.  
550 Washington, DC. 1998.
- 551 46. Anderson M, Gorley RN, Clarke RK. *Permanova+ for Primer: Guide to software and*  
552 *statistical methods*. Plymouth, United Kingdom: PRIMER-E Ltd; 2008.
- 553 47. Gerwing TG, Drolet D, Hamilton DJ, Barbeau MA. Relative importance of biotic and  
554 abiotic forces on the composition and dynamics of a soft-sediment intertidal community  
555 *PLoS One*. 2016;11(1):11:e0147098.
- 556 48. Clarke KR, Gorley RN. *PRIMER v7: user manual/tutorial 3rd ed*. Plymouth, United  
557 Kingdom: Primer-E Ltd; 2015.
- 558 49. McLaren P. The environmental implications of sediment transport in the waters of Prince  
559 Rupert, British Columbia, Canada: A comparison between kinematic and dynamic  
560 approaches. *Journal of Coastal Research*. 2016;32(3):465-82.
- 561 50. Muller G. Index of geoaccumulation in sediments of the Rhine River. *Geojournal*.  
562 1969;2:108-18.
- 563 51. Monte MC, Fuente E, Blanco A, Negro C. Waste management from pulp and paper  
564 production in the European Union. *Waste management*. 2009;29(1):293-308.
- 565 52. Hoffman E, Lyons J, Boxall J, Robertson C, Lake CB, Walker TR. Spatiotemporal  
566 assessment (quarter century) of pulp mill metal (loid) contaminated sediment to inform  
567 remediation decisions. *Environmental monitoring and assessment*. 2017;189(6):257.
- 568 53. Borah P, Singh P, Rangan L, Karak T, Mitra S. Mobility, bioavailability and ecological  
569 risk assessment of cadmium and chromium in soils contaminated by paper mill wastes.  
570 *Groundwater for Sustainable Development*. 2018;6:189-99.
- 571 54. Nriagu JO, Nieboer E. *Chromium in the natural and human environments*: John Wiley &  
572 Sons; 1988.
- 573 55. Kienle C, Langer-Jaesrich M, Baumberger D, Hohmann D, Santiago S, Köhler H-R, et al.  
574 Integrated toxicity evaluation of a pulp deposit using organisms of different trophic levels.  
575 *Journal of soils and sediments*. 2013;13(9):1611-25.

- 576 56. Alvarez MB, Malla ME, Batistoni DA. Comparative assessment of two sequential  
577 chemical extraction schemes for the fractionation of cadmium, chromium, lead and zinc in  
578 surface coastal sediments. *Fresenius' journal of analytical chemistry*. 2001;369(1):81-90.
- 579 57. Chakraborty P, Babu PVR, Sarma VV. A study of lead and cadmium speciation in some  
580 estuarine and coastal sediments. *Chemical Geology*. 2012;294:217-25.
- 581 58. Sizmur T, Canário J, Gerwing TG, Mallory ML, O'Driscoll NJ. Mercury and  
582 methylmercury bioaccumulation by polychaete worms is governed by both feeding ecology  
583 and mercury bioavailability in coastal mudflats. *Environmental Pollution*. 2013;176:18-25.
- 584 59. Weimin Y, Batley G, Ahsanullah M. The ability of sediment extractants to measure the  
585 bioavailability of metals to three marine invertebrates. *Science of the Total Environment*.  
586 1992;125:67-84.
- 587 60. Burton ED, Phillips IR, Hawker DW. Geochemical partitioning of copper, lead, and zinc  
588 in benthic, estuarine sediment profiles. *Journal of environmental quality*. 2005;34(1):263-73.
- 589 61. Luoma SN. Processes affecting metal concentrations in estuarine and coastal marine  
590 sediments. *Heavy metals in the marine environment: CRC Press*; 2017. p. 51-66.
- 591 62. Riba I, Delvalls TÁ, Forja JM, Gómez-Parra A. The influence of pH and salinity on the  
592 toxicity of heavy metals in sediment to the estuarine clam *Ruditapes philippinarum*.  
593 *Environmental toxicology and chemistry*. 2004;23(5):1100-7.
- 594 63. Zhang C, Yu Z-g, Zeng G-m, Jiang M, Yang Z-z, Cui F, et al. Effects of sediment  
595 geochemical properties on heavy metal bioavailability. *Environment International*.  
596 2014;73:270-81. doi: <https://doi.org/10.1016/j.envint.2014.08.010>.
- 597 64. DelValls TÁ, Forja J, González-Mazo E, Gómez-Parra A, Blasco J. Determining  
598 contamination sources in marine sediments using multivariate analysis. *TrAC Trends in*  
599 *Analytical Chemistry*. 1998;17(4):181-92.
- 600 65. Chapman PM, Anderson J. A decision-making framework for sediment contamination.  
601 *Integrated environmental assessment and management*. 2005;1(3):163-73.
- 602 66. Ciutat A, Boudou A. Bioturbation effects on cadmium and zinc transfers from a  
603 contaminated sediment and on metal bioavailability to benthic bivalves. *Environmental*  
604 *toxicology and chemistry*. 2003;22(7):1574-81.
- 605 67. Sizmur T, Canário J, Edmonds S, Godfrey A, O'Driscoll NJ. The polychaete worm *Nereis*  
606 *diversicolor* increases mercury lability and methylation in intertidal mudflats. *Environmental*  
607 *Toxicology and Chemistry*. 2013;32(8):1888-95.
- 608 68. Gerwing TG, Allen Gerwing AM, Macdonald T, Cox K, Juanes F, Dudas SE. Intertidal  
609 soft-sediment community does not respond to disturbance as postulated by the intermediate  
610 disturbance hypothesis. *Journal of Sea Research*. 2017;129:22-8.
- 611 69. Light SF. *The Light and Smith manual: intertidal invertebrates from central California to*  
612 *Oregon*. 4 ed. Cameron JT, editor: University of California Press, Berkely, CA, USA; 2007.

- 613 70. Gerwing TG, Kim JH, Hamilton DJ, Barbeau MA, Addison JA. Diet reconstruction using  
614 next-generation sequencing increases the known ecosystem usage by a shorebird. *The Auk*.  
615 2016;133(2):168–77.
- 616 71. Rainbow PS. Biomonitoring of heavy metal availability in the marine environment.  
617 *Marine pollution bulletin*. 1995;31(4-12):183-92.
- 618 72. Fauchald K, Jumars PA. The diet of worms: a study of polychaete feeding guilds.  
619 *Oceanography and Marine Biology Annual Review*. 1979;17:193-284.
- 620 73. Pagliosa PR. Another diet of worms: the applicability of polychaete feeding guilds as a  
621 useful conceptual framework and biological variable. *Marine Ecology*. 2005;26:246-54.
- 622 74. Howard L, Brown B. Natural variations in tissue concentration of copper, zinc and iron in  
623 the polychaete *Nereis diversicolor*. *Marine biology*. 1983;78(1):87-97.
- 624 75. Saha M, Sarkar S, Bhattacharya B. Interspecific variation in heavy metal body  
625 concentrations in biota of Sunderban mangrove wetland, northeast India. *Environment*  
626 *International*. 2006;32(2):203-7.
- 627 76. Saiz-Salinas J, Francés-Zubillaga G. *Nereis diversicolor*: an unreliable biomonitor of  
628 metal contamination in the ‘Ría de Bilbao’ (Spain). *Marine Ecology*. 1997;18(2):113-25.
- 629 77. Schöne BR, Krause Jr RA. Retrospective environmental biomonitoring–Mussel Watch  
630 expanded. *Global and Planetary Change*. 2016;144:228-51.
- 631 78. Zuykov M, Pelletier E, Harper DAT. Bivalve mollusks in metal pollution studies: from  
632 bioaccumulation to biomonitoring. *Chemosphere*. 2013;93(2):201-8.
- 633 79. Caçador I, Costa J, Duarte B, Silva G, Medeiros J, Azeda C, et al. Macroinvertebrates and  
634 fishes as biomonitors of heavy metal concentration in the Seixal Bay (Tagus Estuary): which  
635 species perform better? *Ecological Indicators*. 2012;19:184-90.
- 636 80. Sarkar SK, Cabral H, Chatterjee M, Cardoso I, Bhattacharya AK, Satpathy KK, et al.  
637 Biomonitoring of heavy metals using the bivalve molluscs in Sunderban mangrove wetland,  
638 northeast coast of Bay of Bengal (India): possible risks to human health. *CLEAN–Soil, Air,*  
639 *Water*. 2008;36(2):187-94.
- 640 81. Bard S, M., A biological index to predict pulp mill pollution levels. *Water environment*  
641 *research*. 1998;70(1):108-22.
- 642 82. Robin J, Harger E, Nassichuk MD. Marine intertidal community responses to Kraft pulp  
643 mill effluent. *Water, Air, and Soil Pollution*. 1974;3(1):107-22.

644

## 645 **Supporting information captions**

646 The supporting information file contains additional text that elaborates on the quality control and  
647 statistical analysis undertaken in addition to the following tables:

648

649 **S1 Table. PERMANCOVA showing sediment properties (pH, median particle diameter, C and N)**  
650 **varied by site, depth, and transect.**  
651

652 **S2 Table. PERMANCOVA showing that sediment total and available (EDTA extractable) PTEs varied**  
653 **by site and transect.**  
654

655 **S3 Table. Analysis of Variance for sediment properties. F-statistics of a two-way ANOVA with 'site'**  
656 **and 'depth' as the two factors. The last two columns indicate whether reference sites; Tye Banks**  
657 **(TB), Wolfe Cove (WC) and Inverness Passage (IP) are significantly ( $p < 0.05$ ) different from**  
658 **potentially contaminated sites (Cassiar Cannery and Papermill Bay).**  
659

660 **S4 Table. Concentrations ( $\text{mg kg}^{-1}$ ) of Cr, Co, Ni, Cu, Zn, As, Cd and Pb in benthic invertebrates**  
661 **sampled from five intertidal mudflats along the north coast of British Columbia, Canada. CC:**  
662 **Cassiar Cannery. WC: Wolfe Cove. IP: Inverness Passage. PB: Papermill Bay. TB: Tye Banks**  
663

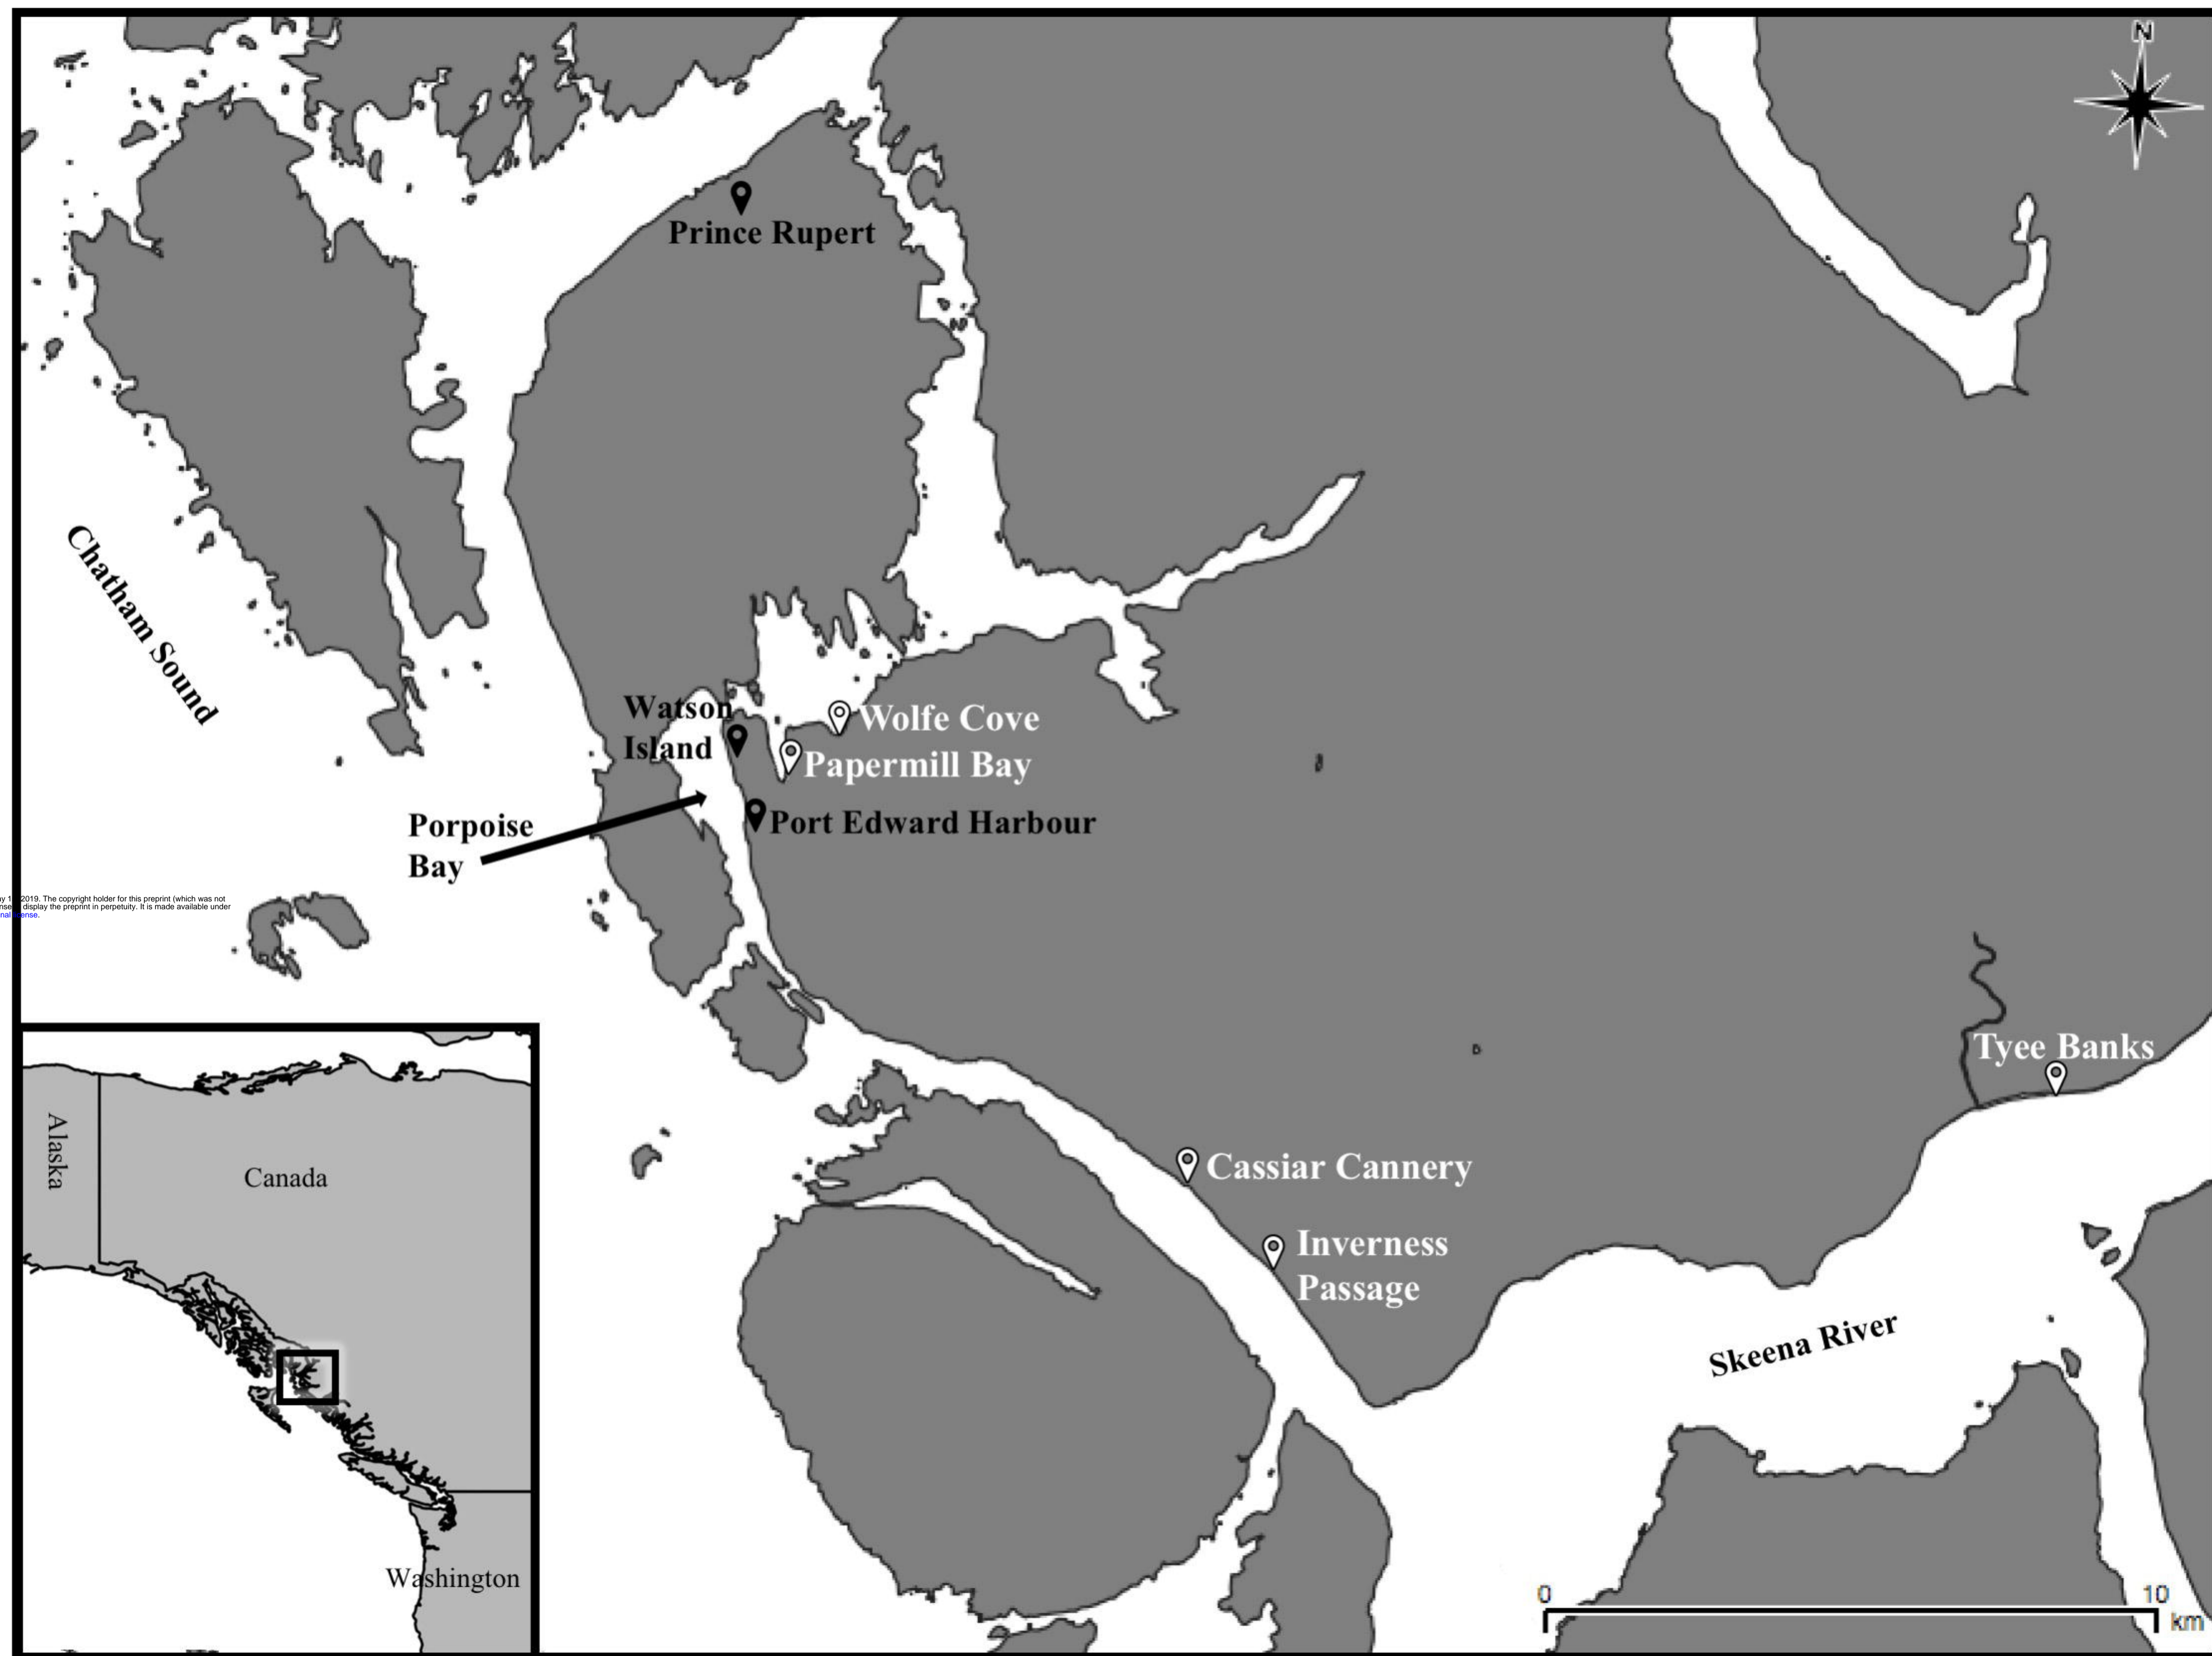

bioRxiv preprint doi: <https://doi.org/10.1101/623587>; this version posted May 11, 2019. The copyright holder for this preprint (which was not certified by peer review) is the author/funder, who has granted bioRxiv a license to display the preprint in perpetuity. It is made available under aCC-BY 4.0 International license.

- Cassiar Cannery      □ Inverness Passage      ▲ Papermill bay  
 △ Wolf Cove      ● Tye Banks

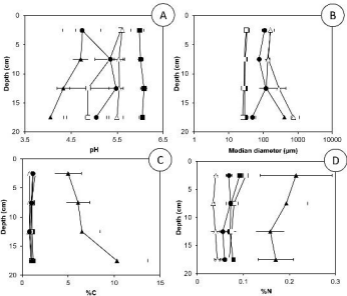

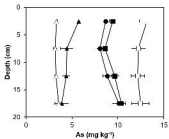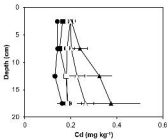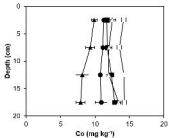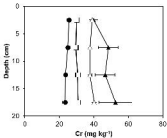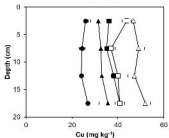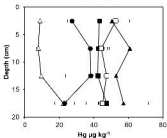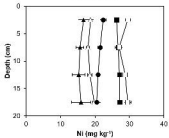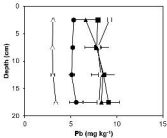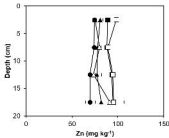

- Cassiar Cannery
- Inverness Passage
- ▲ Papermill bay
- △ Wolfe Cove
- Tye Banks



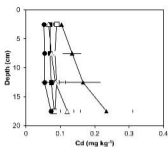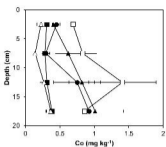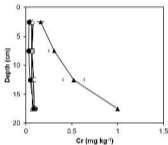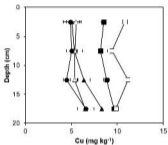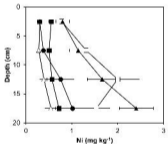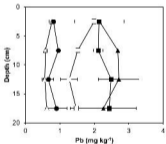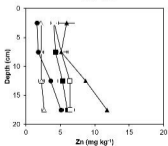

- Cassiar Cannery
- Inverness Passage
- ▲ Papermill bay
- △ Wolf Cove
- Tyee Banks

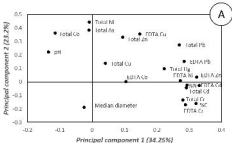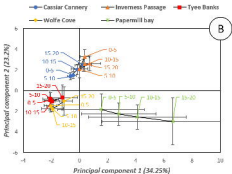

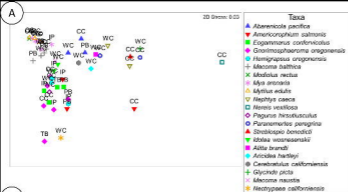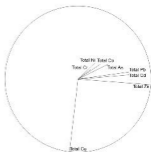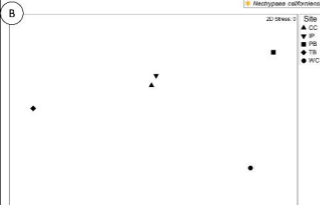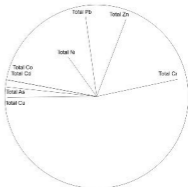

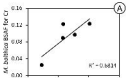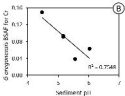

Source: https://www.biorxiv.org/content/biorxiv/early/2019/05/15/623587.full.pdf
